# Supplementary material for: Enabling batch and microfluidic non-thermal plasma chemistry: reactor design and testing
Source: Royal Society of Chemistry journal article supplement (doi:10.1039/d3lc00016h), 2023-01-01
Supplement: d3lc00016h2.pdf [file d3lc00016h2.pdf]

## Supporting information

### Enabling batch and microfluidic non-thermal plasma chemistry: reactor design and testing.

Patrycja Roszkowska,<sup>a</sup> Aaron Dickenson,<sup>b</sup> Jonathan E. Higham,<sup>c</sup> Timothy L. Eason,<sup>d,e\*</sup> James Walsh,<sup>b,f\*</sup> Anna G. Slater<sup>a\*</sup>

<sup>a</sup>Department of Chemistry and Materials Innovation Factory, <sup>b</sup>Department of Electrical Engineering and Electronics, and <sup>c</sup>Department of Geography and Planning, School of Environmental Sciences, University of Liverpool, Liverpool, UK; <sup>d</sup>School of Chemistry, Cardiff University, Main Building, Park Place, Cardiff CF10 3AT, UK, <sup>e</sup>School of Chemistry, Haworth Building, University of Birmingham, Birmingham B15 2TT; <sup>f</sup>York Plasma Institute, School of Physics, Engineering & Technology, University of York, York YO10 5DQ.

#### Reactor setup development:

Initially, two prototypes were designed using computer-aided design (CAD) and printed with use of fused deposition modelling (FDM) 3D printing technology using an Ultimaker 3. The first 3D printed chip had two liquid entrances (continuous phase), a plasma entrance (disperse phase), and an outlet (SI Fig. 1-1 and Fig. 2). The FDM slicing settings applied via Cura are available in SI Table 1, the material used was transparent PLA.

The major drawback in this chip design was lack of transparency and difficulties accessing the junction of the chip with the microscope lens. Therefore the design and printing method (SI Table 2) were improved yielding a second chip (SI Fig. 1-2 and Fig. 3). The inset to the SI Fig 1-2 shows that new design and printing method made it possible to successfully record the bubbles of plasma with an optical microscope. The final version of the non thermal plasma microfluidic reactor (NTP-MR) is shown in Fig 1-3, working setup can be found in he following link: <https://www.dropbox.com/s/1dizxtjqigop5zo/NTP-MR.mov?dl=0>.

#### Chip prototyping

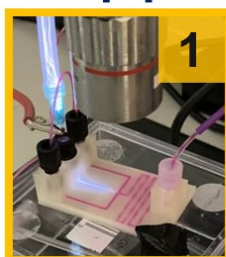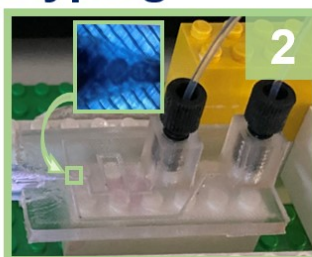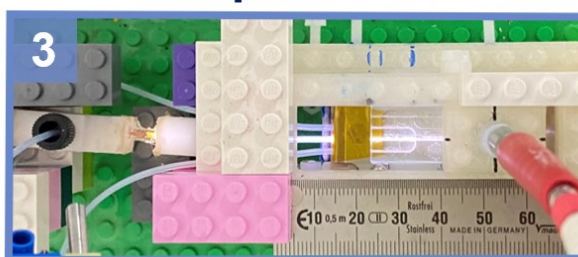

#### Completed NTP-MR

#### Microfluidic plasma probe

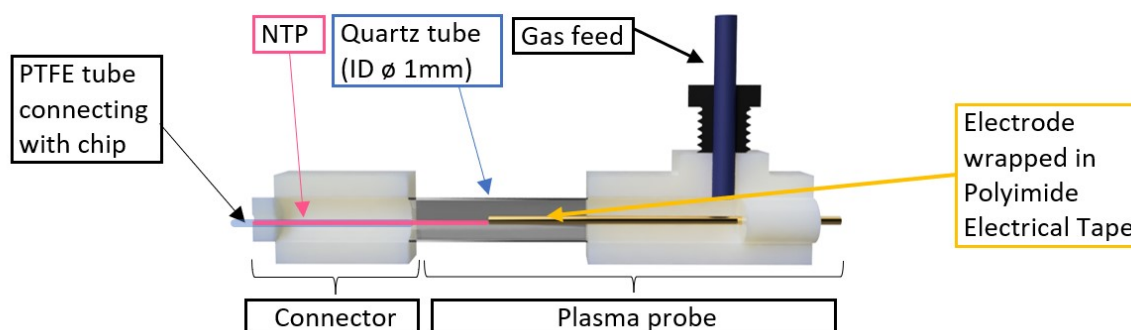

Figure 1. Development stages of Non Thermal Plasma Microfluidic Reactor (top): 1- 3D printed microfluidic chip prototype; 2- 3D printed microfluidic chip with transparent window; 3- final product with adapted Dolomite chip. Bottom: schematic representation of microfluidic plasma probe design.

### 3D printing method parameters and resulting printed chips.

The stl. for the model below is available under the following link:

<https://www.thingiverse.com/thing:5448222>

The channel size is 0.8mm.

| Method 1                      |           |
|-------------------------------|-----------|
| Setting name                  | Option    |
| <b>Quality</b>                |           |
| Layer Height                  | 0.06mm    |
| <b>Shell</b>                  |           |
| Wall Thickness                | 1mm       |
| Wall Line Count               | 3         |
| Top/Bottom Thickness          | 1mm       |
| Top Thickness                 | 1mm       |
| Top Layers                    | 17        |
| Bottom Thickness              | 1mm       |
| Bottom Layers                 | 17        |
| Horizontal Expansion          | 0mm       |
| <b>Infill</b>                 |           |
| Infill Density                | 20%       |
| Infill Pattern                | triangles |
| <b>Material</b>               |           |
| Printing Temperature          | 195°C     |
| Build Plate Temperature       | 60°C      |
| Enable Retraction             | ✓         |
| <b>Speed</b>                  |           |
| Print Speed                   | 60mm/s    |
| <b>Travel</b>                 |           |
| Z Hop When Retracted          |           |
| <b>Cooling</b>                |           |
| Enable Print Cooling          | ✓         |
| Fan Speed                     | 100%      |
| <b>Support</b>                |           |
| Generate Support              | OFF       |
| <b>Build Plate Adhesion</b>   |           |
| Enable Prime Blob             | ✓         |
| Build Plate Adhesion Type     | Brim      |
| Build Plate Adhesion Extruder | Extr.1    |
| <b>Dual Extrusion</b>         |           |
| Enable Prime Tower            | OFF       |

Table 1. Summary of FDM method 1 used with Ultimaker Cura on an Ultimaker 3 3D printer.

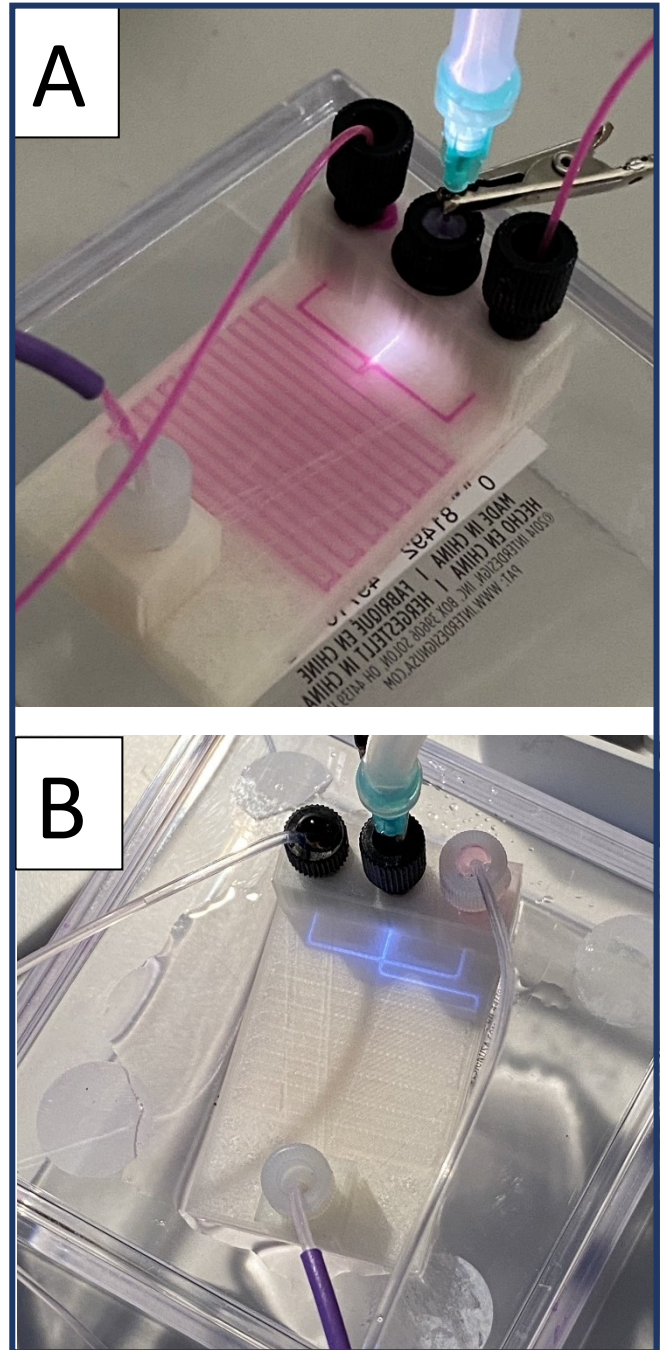

Figure 2. Microfluidic chip in use with plasma: A- and water with food dye; B- without any solution in the chip. Printed using PLA filament with method 1 sliced with Ultimaker Cura on Ultimaker 3, 3D printer.

The stl. for the model below is available under the following link:  
<https://www.thingiverse.com/thing:5448241>

| Method 2                      |        |
|-------------------------------|--------|
| Setting name                  | Option |
| <b>Quality</b>                |        |
| Layer Height                  | 0.05mm |
| <b>Shell</b>                  |        |
| Wall Thickness                | 1mm    |
| Wall Line Count               | 3      |
| Top/Bottom Thickness          | 1mm    |
| Top Thickness                 | 1mm    |
| Top Layers                    | 0      |
| Bottom Thickness              | 1mm    |
| Bottom Layers                 | 999999 |
| Horizontal Expansion          | 0mm    |
| <b>Infill</b>                 |        |
| Infill Density                | 100%   |
| Infill Pattern                | lines  |
| <b>Material</b>               |        |
| Printing Temperature          | 250°C  |
| Build Plate Temperature       | 100°C  |
| Enable Retraction             | ✓      |
| <b>Speed</b>                  |        |
| Print Speed                   | 50mm/s |
| <b>Travel</b>                 |        |
| Z Hop When Retracted          | ✓      |
| <b>Cooling</b>                |        |
| Enable Print Cooling          | OFF    |
| <b>Support</b>                |        |
| Generate Support              | OFF    |
| <b>Build Plate Adhesion</b>   |        |
| Enable Prime Blob             | ✓      |
| Build Plate Adhesion Type     | Brim   |
| Build Plate Adhesion Extruder | Extr.1 |
| <b>Dual Extrusion</b>         |        |
| Enable Prime Tower            | OFF    |

Table 2. Summary of FDM method 2 used with Ultimaker Cura on Ultimaker 3, 3D printer.

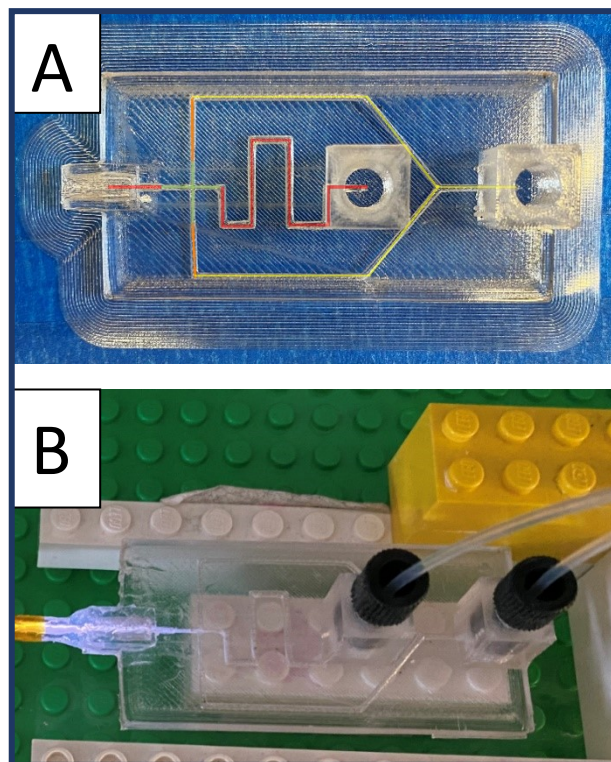

Figure 3. Microfluidic chip: A- crude 3d printed chip; Channel size: red-1.2 mm; green-0.6 mm; orange-0.8 mm; yellow-1 mm; B- ready to use 3d printed chip. Printed using PETg filament with method 2 sliced with Ultimaker Cura on Ultimaker

**3D printing designs for the Optical Emission Spectra (OES) fibre-probe holder.**

The stl. for the model below is available under the following link:

<https://www.thingiverse.com/thing:5874553>

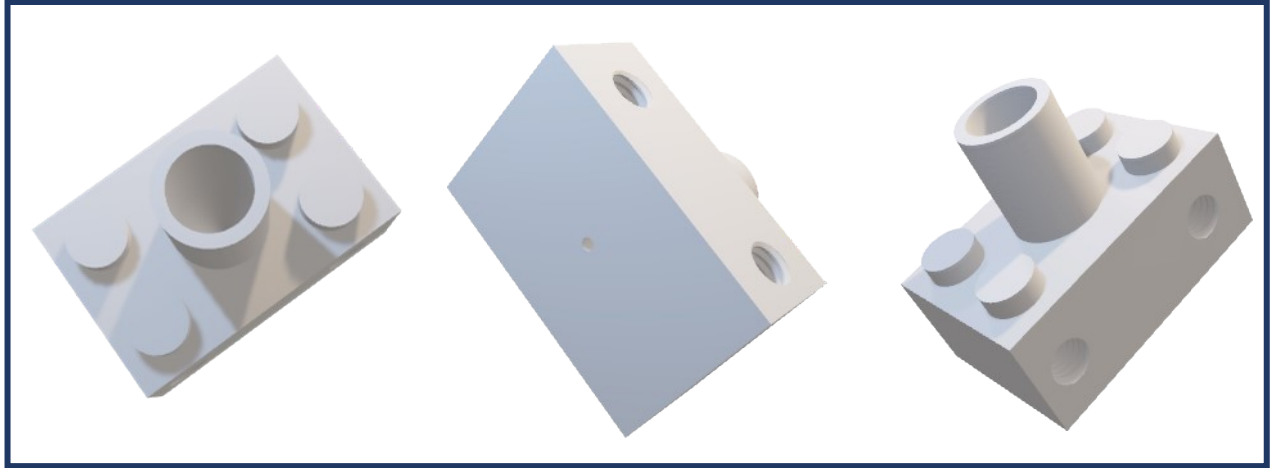

Figure 4. CAD designs for 3D printing parts to reproducibly hold the OES fibre-probe in place. Designed to be used with parts presented in Figure 5. Dimensions of the block fit standard commercially available interlocking modular plastic blocks, the hole for the OES is 1 mm diameter.

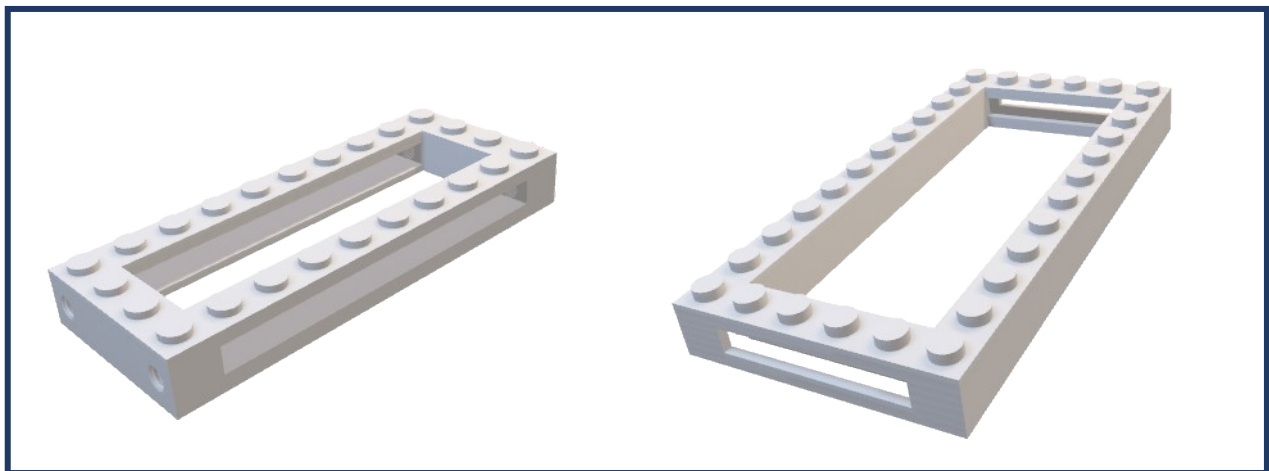

Figure 5. CAD designs for 3D printing parts allowing reproducible movement of the OES holder across the X and Y axis. Dimensions of the block fit standard commercially available interlocking modular plastic blocks.

## Methylene Blue proposed reaction pathway

The mechanism of degradation of methylene blue (MB) has been previously discussed: for example, Huang<sup>1</sup> (2010) proposed the mechanism of MB degradation based on bond dissociation energy (BDE) and highlighted possible breakdown of the molecules supported by the experimental data presented in their study (Scheme 1, pathway 1). The work of Benetoli<sup>2</sup> (2012) assumed two possible pathways, one by the impact of high energy electron (Scheme 1, pathway 2); the second via successive hydroxylation addition of the MB benzene ring. In the work of Attri<sup>3</sup> (2016), experimental and simulation work was used to better understand the mechanism of MB degradation; although their result agreed on the importance of OH radicals, full reaction pathways were not proposed. Krosuri<sup>4</sup> (2021) used TIC to analyse intermediate and final product of the MB degradation which corresponded to the first pathway presented by Benetoli (Scheme 1, pathway 2). Here, we focus on reactor design and hence have not investigated which degradation pathway is followed.

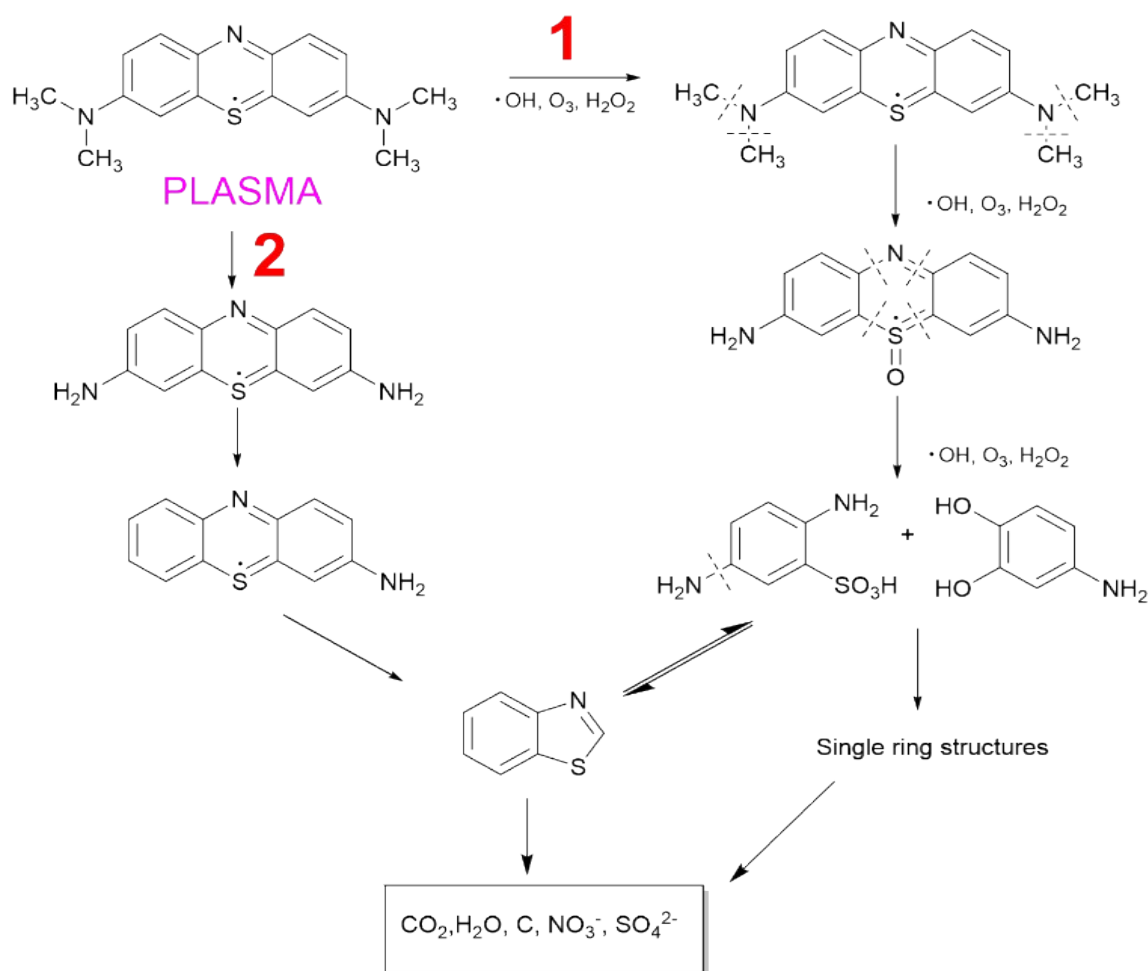

Scheme 1 Possible NTP degradation pathways as described in references S1 and S2.

### Energy Yield Calculations:

The energy efficiency ( $Y$ ) of MB degradation<sup>5</sup> is calculated from the following equation:

$$Y(\text{g kW}^{-1} \text{ h}^{-1}) = \frac{C(\text{g L}^{-1}) \times V(\text{L}) \times \frac{1}{100} \times \eta(\%)}{P(\text{kW}) \times t(\text{h})}$$

Where  $C$  is the initial concentration of MB,  $V$  is the volume of the sample,  $\eta$  is the degradation at the  $t$  time and  $P$  is the power used.

### References:

- S1 F. Huang, L. Chen, H. Wang and Z. Yan, *Chem. Eng. J.*, 2010, **162**, 250–256.
- S2 L. O. de B. Benetoli, B. M. Cadorin, V. Z. Baldissarelli, R. Geremias, I. G. de Souza and N. A. Debacher, *J. Hazard. Mater.*, 2012, **237–238**, 55–62.
- S3 P. Attri, M. Yusupov, J. H. Park, L. P. Lingamdinne, J. R. Koduru, M. Shiratani, E. H. Choi and A. Bogaerts, *Sci. Rep.*, 2016, **6**, 1–14.
- S4 A. Krosuri, S. Wu, M. A. Bashir and M. Walquist, *J. Water Process Eng.*, 2021, **40**  
DOI:10.1016/j.jwpe.2021.101926.
- S5 L. Wu, Q. Xie, Y. Lv, Z. Zhang, Z. Wu, X. Liang, M. Lu and Y. Nie, *RSC Adv.*, 2019, **9**, 25967–25975.
